# Supplementary material
Source: PubMed Central journal article supplement (PMC4250111)
Supplement: pnas.201414215SI.pdf [file pnas.201414215SI.pdf]

# Supporting Information

Ling et al. 10.1073/pnas.1414215111

## SI Materials and Methods

**Synthesis of Multilayer  $\text{Ti}_3\text{C}_2\text{T}_x$  Powder.** The processing details of MAX phase,  $\text{Ti}_3\text{AlC}_2$ , used in this study can be found elsewhere (7). Stacked or multilayer  $\text{Ti}_3\text{C}_2\text{T}_x$  (MI- $\text{Ti}_3\text{C}_2\text{T}_x$ ) powder was prepared by selective etching the Al layer from  $\text{Ti}_3\text{AlC}_2$ . Specifically,  $\text{Ti}_3\text{AlC}_2$  powder, with a particle size less than  $38\ \mu\text{m}$ , was immersed, at room temperature (RT), in a 50 wt% aqueous HF solution (Fisher Scientific) with a ratio of 1 g of  $\text{Ti}_3\text{AlC}_2$  per 10 mL of HF solution for 18 h while magnetically stirring the solution. The obtained suspension was diluted with deionized water and centrifuged to obtain the MI- $\text{Ti}_3\text{C}_2\text{T}_x$  powders, which were then washed until the pH of the supernatant was above 6. The produced powder was dried at RT over 24 h.

**Delamination of  $\text{Ti}_3\text{C}_2\text{T}_x$ .** To obtain few- and/or single-layer flakes, the MI- $\text{Ti}_3\text{C}_2\text{T}_x$  powders were delaminated. Dimethyl sulfoxide (DMSO) was used to enhance the delamination process (13). In this case, the MI- $\text{Ti}_3\text{C}_2\text{T}_x$  powders were magnetically stirred in DMSO, at a ratio of 1 g of MI- $\text{Ti}_3\text{C}_2\text{T}_x$  per 12 mL, respectively, for 18 h at RT. Then 30 mL of deionized water was added to the suspension, and the DMSO intercalated MI- $\text{Ti}_3\text{C}_2\text{T}_x$  was separated by centrifugation at 3,500 rpm for 5 min. The obtained powder was dispersed in deaerated water with a weight ratio of MI- $\text{Ti}_3\text{C}_2\text{T}_x$ :water of 1:300. The suspension was sonicated under flowing Ar for 5 h, and then centrifuged at 3,500 rpm for 1 h to obtain the supernatant containing  $\text{Ti}_3\text{C}_2\text{T}_x$  flakes, henceforth referred to as the MXene colloidal solution.

**Characterization.** A scanning electron microscope (SEM) (Zeiss Supra 50VP) was used to study the morphology of the produced flakes and films. Elemental analysis was conducted using an energy-dispersive X-ray spectrometer (Oxford EDS, with INCA software). A TEM (JEOL JEM-2100F) operating at 200 kV was used to obtain images of the  $\text{Ti}_3\text{C}_2\text{T}_x$  MXene flakes and  $\text{Ti}_3\text{C}_2\text{T}_x$ /PVA films. The  $\text{Ti}_3\text{C}_2\text{T}_x$  flakes for TEM were prepared by dropping the colloidal solution of MXene on a lacey carbon-coated copper grid. The  $\text{Ti}_3\text{C}_2\text{T}_x$ /PVA cross-sections were produced by first embedding the films in epoxy resin and then cutting them using a glass microtome. The produced chips were placed on a lacey carbon-coated copper grid.

The conductivity was measured at RT via a four-probe technique (Jandel Engineering Limited). The distance between probes was 1.0 mm. The range of voltage used was from 0 to 4 V. The contact angle was measured at RT using the sessile drop technique. A water drop with a volume of  $10\ \mu\text{L}$  was placed on the surface of a  $\text{Ti}_3\text{C}_2\text{T}_x$  film and allowed to stabilize for 45 s before a picture was taken. The XRD patterns were recorded by a powder diffractometer (Rigaku SmartLab) with  $\text{Cu K}\alpha$  radiation at a step size of  $0.02^\circ$  and a collection time of 0.5 s per step. The  $\zeta$ -potential was measured using a particle size analyzer (Zetasizer NanoZS; Malvern). The  $\text{Ti}_3\text{C}_2\text{T}_x$  solution tested had a concentration of 0.3 mg/mL. The centrifugation was conducted on a HERMLE centrifuge (Z400, South of Germany) with 12 rotors at 3,500 rpm ( $2,547 \times g$ ).

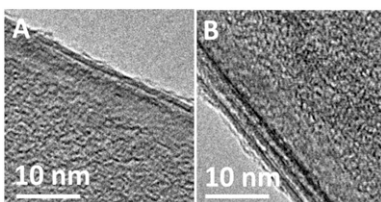

Fig. S1. High-resolution TEM images of (A) two- and (B) three-layer  $\text{Ti}_3\text{C}_2\text{T}_x$  flakes.

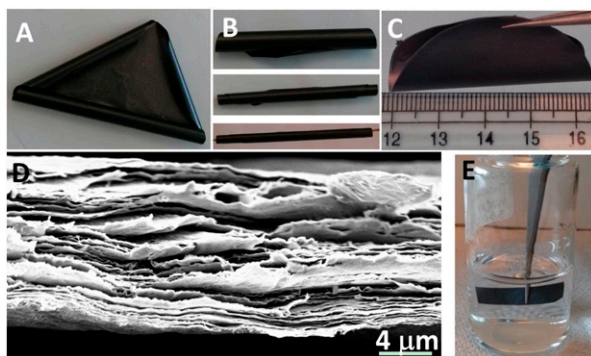

Fig. S2. (A) Digital image of a free-standing  $\text{Ti}_3\text{C}_2\text{T}_x$  film with diameter of  $\sim 40\ \text{mm}$ . (B) Rolled films on to 10-, 5-, and 1-mm-diameter (from Top to Bottom) glass rods and copper wire. The films weight was  $\sim 6\ \text{mg}$ . (C) A  $13\text{-}\mu\text{m}$ -thick  $\text{Ti}_3\text{C}_2\text{T}_x$  film having a mass of 50.1 mg still shows impressive flexibility. (D) Cross-sectional SEM image of a 50-mg film. (E) Digital image of  $\text{Ti}_3\text{C}_2\text{T}_x$  film after storage in deionized water for 1 month (see associated digital [Movie S2](#)).

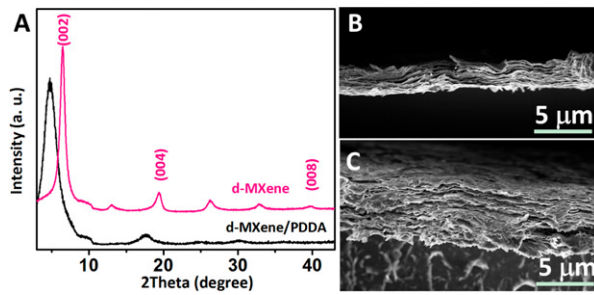

**Fig. S3.** (A) XRD patterns of  $Ti_3C_2T_x/PDDA$  and  $Ti_3C_2T_x$  films. (B and C) Fractured, cross-sectional SEM micrographs of 2.2- $\mu m$ -thick (B) and 5.3- $\mu m$ -thick (C)  $Ti_3C_2T_x/PDDA$  films.

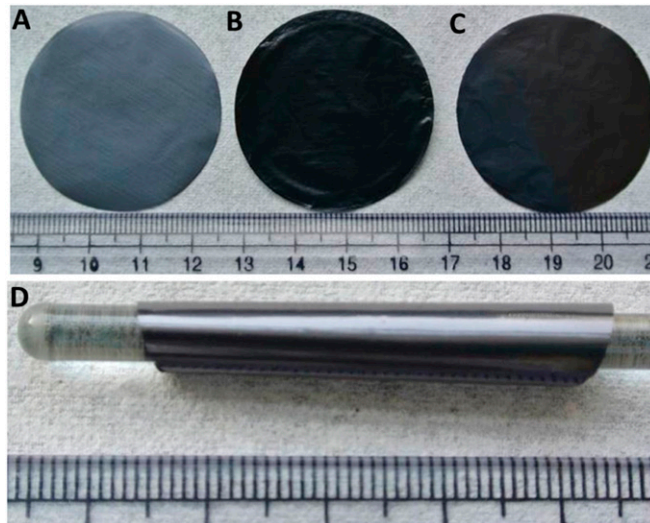

**Fig. S4.** Digital images of flat (A)  $Ti_3C_2T_x$ , (B)  $Ti_3C_2T_x/PVA$ , and (C)  $Ti_3C_2T_x/PDDA$  films, and (D) rolled shiny  $Ti_3C_2T_x$  film on a glass rod (diameter of 10 mm).

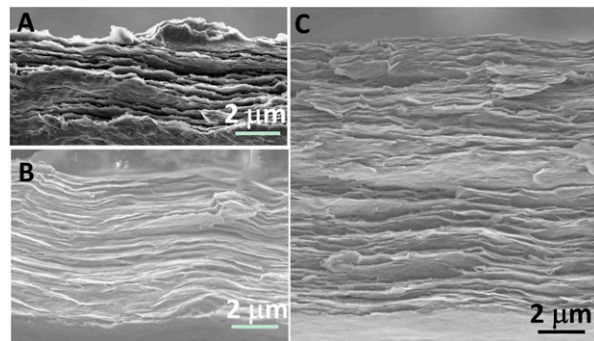

**Fig. S5.** Cross-sectional SEM images of (A) 90 wt%  $Ti_3C_2T_x/PVA$ , (B) 60 wt%  $Ti_3C_2T_x/PVA$ , and (C) 40 wt%  $Ti_3C_2T_x/PVA$  films.

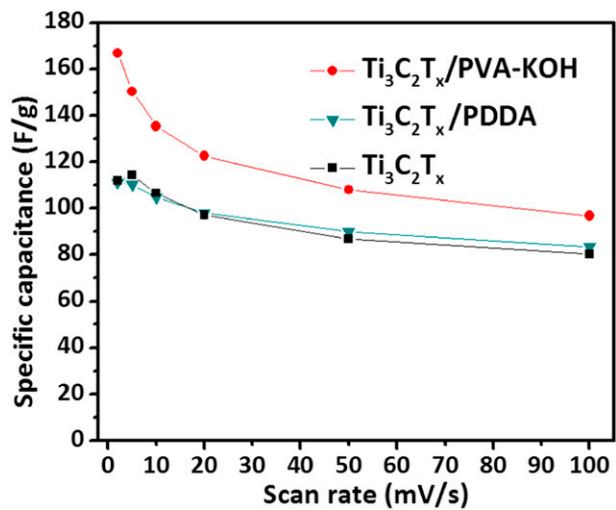

Fig. S6. Gravimetric capacitances of  $Ti_3C_2T_x$ ,  $Ti_3C_2T_x/PDDA$ , and  $Ti_3C_2T_x/PVA-KOH$  films at different scan rates.

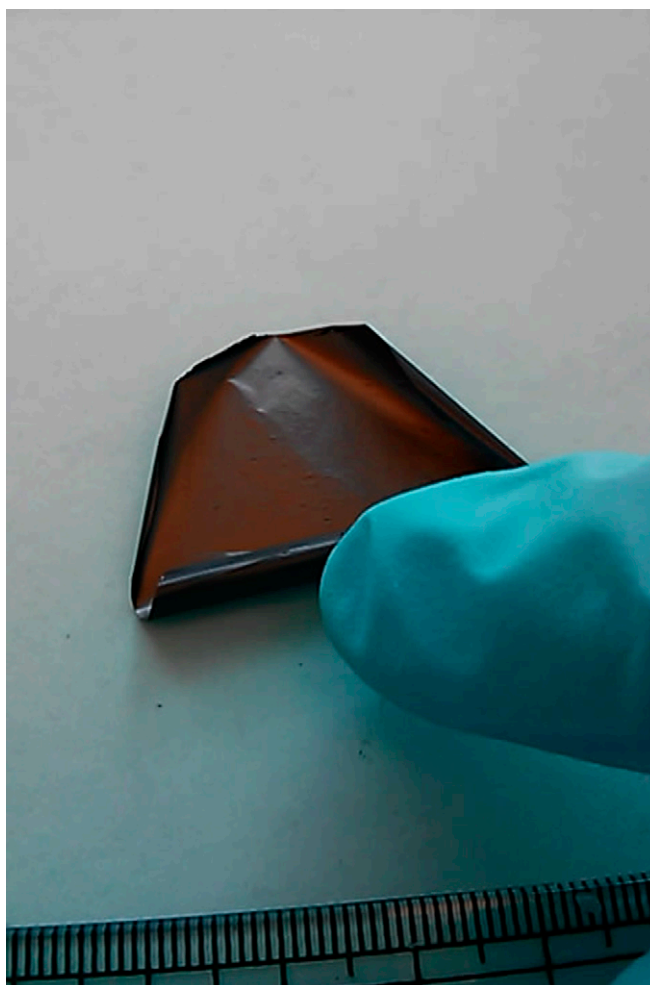

Movie S1. Highly flexible d-MXene film.

[Movie S1](#)

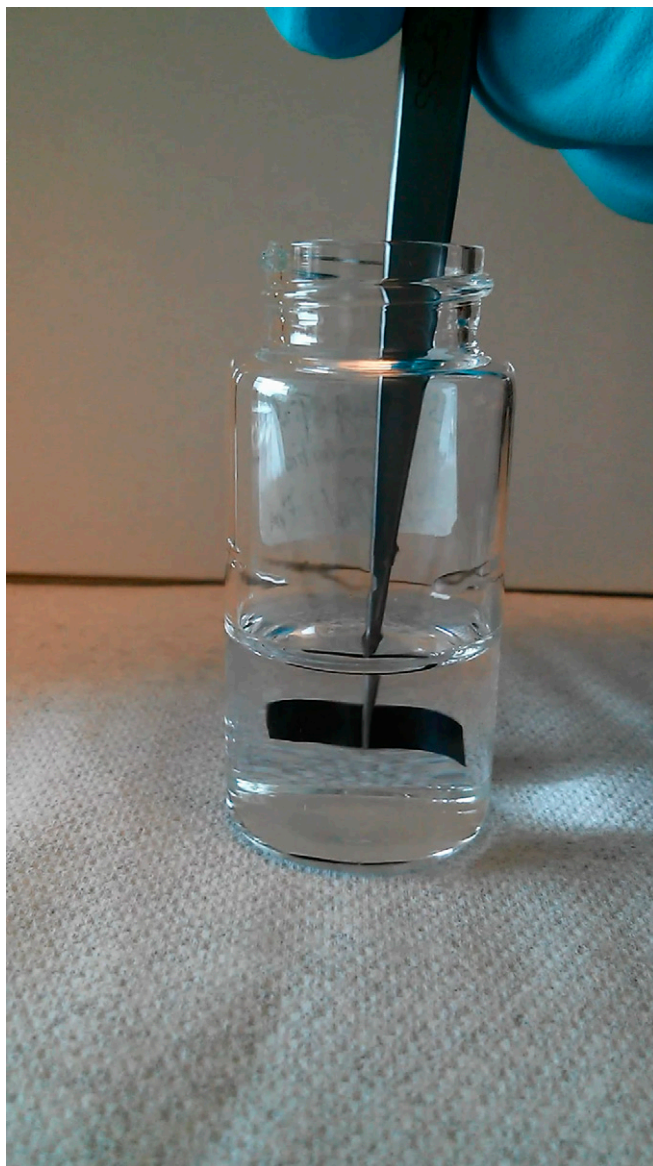

**Movie S2.** Flexible free-standing d-MXene film remains intact when subjected to violent shaking under water.

[Movie S2](#)
